# Supplementary material for: Proximity ligation assay evaluates IDH1R132H presentation in gliomas
Source: JCI journal article supplement (doi:10.1172/jci77780), 2015-01-02

**Supplementary Figure 1. PLA positivity depends on HLA-DR expression in LN229 IDH1(D252G R132H).** (A) IF detection of endogenous HLA-DR in LN229 IDH1(D252G R132H) (LN229 DG RH) by mouse anti-human HLA-DR (TAL1B5) antibody; green, HLA-DR; blue, DAPI; 40x objective. (B) IDH1(R132H)-HLA-DR-PLA on siCONTROL and siHLA-DRA treated LN229 IDH1(D252G R132H) co-

stained with TAL1B5; red, PLA; green, HLA-DR; blue, DAPI; left panels, 63x; right panels, 40x objectives, respectively. Representatives of 3 experiments each.

**Supplementary Figure 2. Localization of PLA signal in LN229 IDH1(R132H) IVE2.** (A) IF detection of retrovirally transfected IDH1(R132H) and IDH1(WT) in LN229 IVE2 and LN229 IDH1(WT); green, IDH1(R132H); blue, DAPI; 20x objective. Representative of 3 experiments. (B) IDH1(R132H)-HLA-DR-PLA on LN229 IDH1(R132H) IVE2 and IDH1(WT) co-stained with Annexin V (annexin); red, PLA signal; green, annexin; blue, DAPI. Representative of 3 experiments. (C) IDH1(R132H)-HLA-DR-PLA on LN229 IDH1(R132H) IVE2 co-stained with Rab7; red, PLA signal; green, Rab7; blue, DAPI. Experiment was performed once. White arrows, PLA signal in annexin (B) or Rab7 (C) positive areas, respectively; 63 objective.

**Supplementary Figure 3. Correlation of IDH1(R132H) expression level and PLA signal in LN229 IDH1(R132H) IVE2.** (A) Exemplary IDH1(R132H)-HLA-DR PLA on LN229 IDH1(R132H) IVE2; red, PLA signal; green, IDH1(R132H); blue, DAPI. (B) ImageJ algorithm analyzing IDH1R132H-expression (MFI, mean fluorescence intensity of IDH1R132H co-staining) and PLA signal on single cell level; red numbers, IDH1R132H+ cells; right panel, blue numbers, PLA signals. (C) Quantification of (B). (D) Correlation plot of (C);  $n = 27$ , Spearman's rho,  $r = 0.6020$ ,  $p = 0.0009$ . (A, B) 63x objective.

**Supplementary Figure 4. IDH1(R132H) and HLA-DR expression and histological analysis of primary glioma cell lines NPH001 (A°III), NCH645 (secondary GBM), and NCH620 (secondary GBM).** (A) HLA-DR IHC and IDH1(R132H) IHC on NPH001 and NCH645; 40x objective. (B) H&E staining of NPH001, NCH645, and NCH620; 20x objective. Representatives of 3 experiments each.

**Supplementary Figure 5. NY-ESO-1 overexpression in glioma cell line LN229.** IF of LN229 EV (empty vector) and LN229 NY (NY-ESO-1); green, NY-ESO-1; blue, DAPI; 40x objective. Representative of 3 experiments.

**Supplementary Figure 6. NY-ESO-1-HLA-DR PLA on melanoma cell lines SK-Mel-37 and SK-Mel-23.** (A) Negative control to NY-ESO-1 IF in SK-Mel-37; green, secondary antibody only; blue, DAPI; 40x objective. Representative of 3 experiments. (B) Western blot detecting endogenous NY-

ESO-1 in SK-Mel-23 (negative control) and SK-Mel-37 and myc-tagged (\*) NY-ESO-1 overexpressed in LN229; tubulin, loading control; LN229 EV, empty vector, negative control. Representative of 3 experiments. (C) NY-ESO-1-HLA-DR PLA on SK-Mel-23 (negative control); red, PLA signal; blue, DAPI; 63x objective. Experiment was performed once. (D and E) NY-ESO-1-HLA-DR PLA co-stained for HLA-DR (D) and NY-ESO-1 (E) on SK-Mel-37 treated with siHLA-DRA, siNY-ESO-1, and siCONTROL; red, PLA signal; green, HLA-DR, NY-ESO-1, respectively; blue, DAPI; 40x objective (D); (E) confocal acquisition (100x); red arrow, PLA signal; white arrows, siNY-ESO-1 transfected cells. Representative of 2 experiments.

**Supplementary Figure 7. In-depth analysis of PLA positivity in tumor tissue in situ.** (A) Correlation of PLA positivity and HLA-DR expression (semiquantitative; -, negative; +, low; ++, moderate; +++, strong) in IDH1(R132H)+ tumors; n = 20, n(PLA positive) = 10, n(PLA negative) = 10, p = 0.08471, wilcoxon rank sum test; if HLA-DR- excluded, n = 15, n(PLA positive) = 10, n(PLA negative) = 5, p = 0.7274, wilcoxon rank sum test. (B) IDH1(R132H)-HLA-DR PLA co-stained for endothelial marker CD34 on tumor tissues p016 (63x objective) and p017 (40x objective); red, PLA signal; green, CD34; blue, DAPI. White arrows indicate CD34 positivity. Each patient was analyzed once.

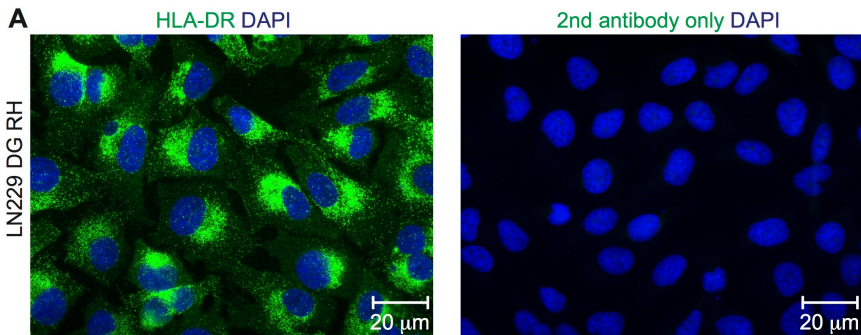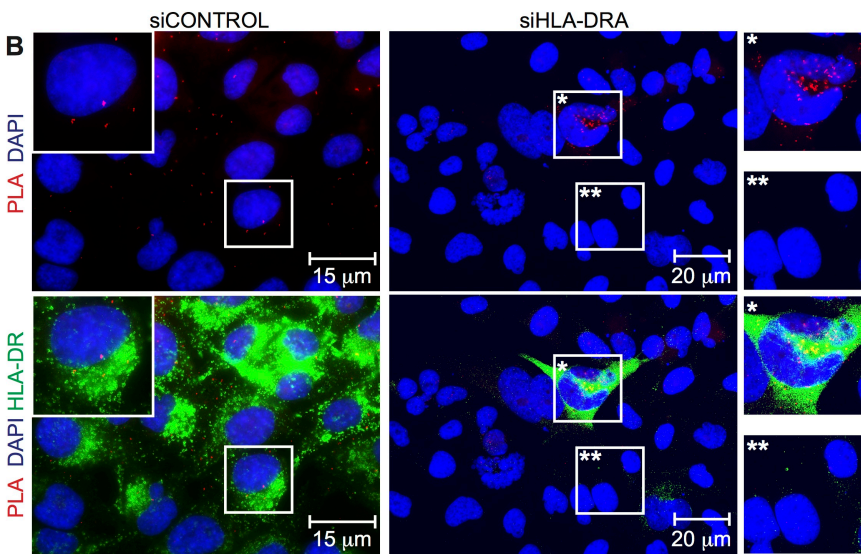

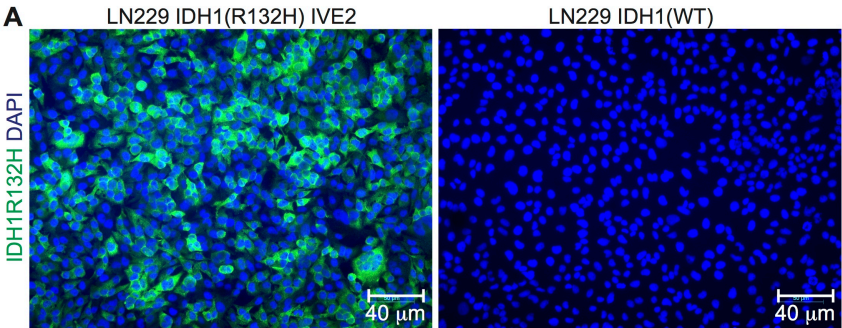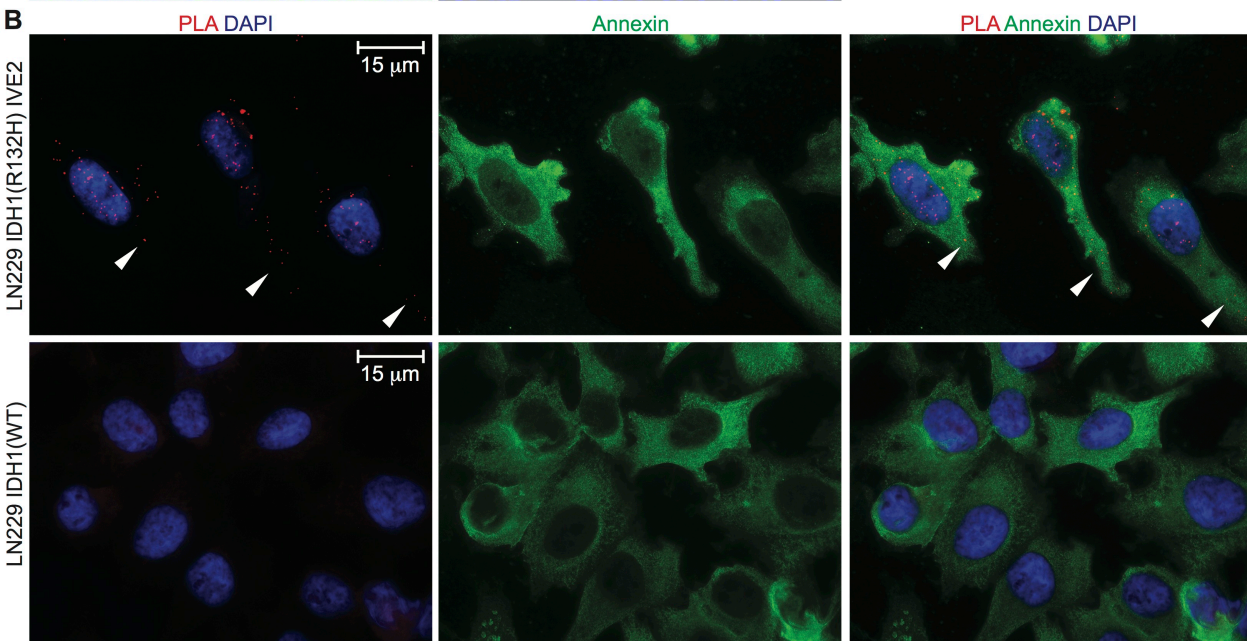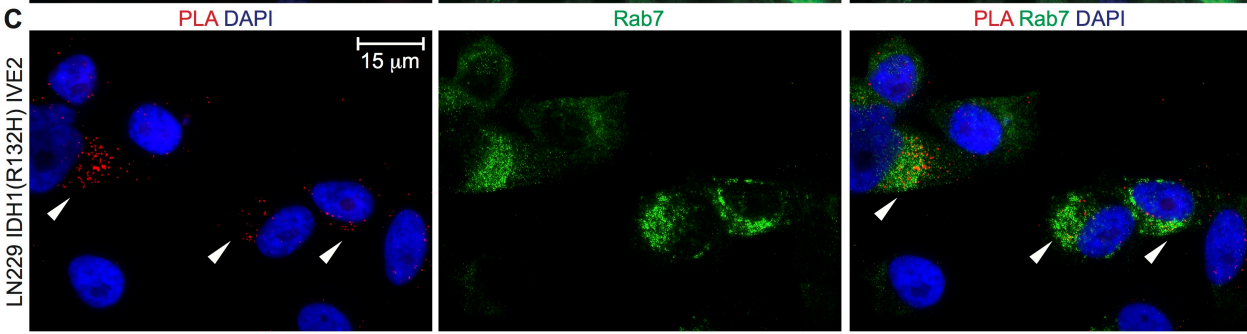

PLA

IDH1R132H

PLA IDH1R132H DAPI

A

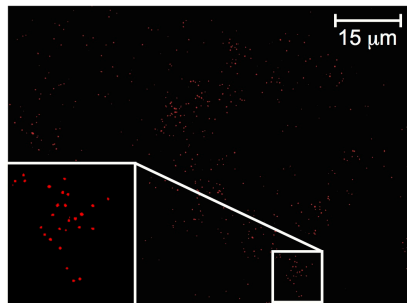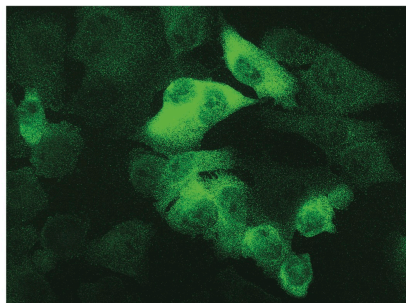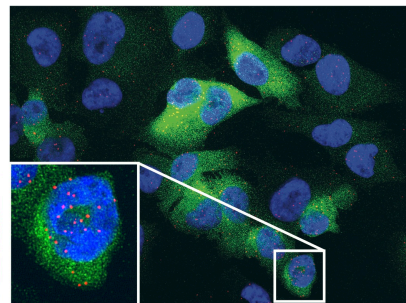

B

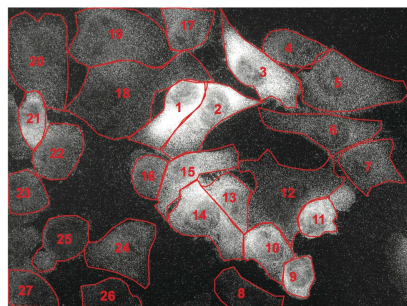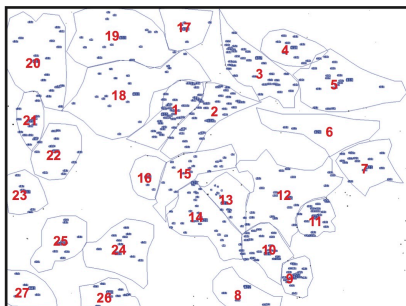

C

| cell | MFI / cell     | PLA / cell |
|------|----------------|------------|
| 1    | 4,089872e+007  | 41         |
| 2    | 3,460013e+007  | 36         |
| 3    | 3,2555176e+007 | 38         |
| 4    | 1,0320998e+007 | 11         |
| 5    | 1,0384579e+007 | 21         |
| 6    | 9,175482e+006  | 3          |
| 7    | 9,306426e+006  | 14         |
| 8    | 4,496312e+006  | 7          |
| 9    | 2,0238572e+007 | 19         |
| 10   | 2,093166e+007  | 25         |
| 11   | 2,7804776e+007 | 19         |
| 12   | 8,236265e+006  | 20         |
| 13   | 2,3682438e+007 | 15         |
| 14   | 2,360654e+007  | 29         |
| 15   | 2,2756188e+007 | 19         |
| 16   | 1,2028082e+007 | 5          |
| 17   | 1,265542e+007  | 6          |
| 18   | 8,417153e+006  | 21         |
| 19   | 9,820301e+006  | 16         |
| 20   | 8,739797e+006  | 20         |
| 21   | 2,204244e+007  | 15         |
| 22   | 1,109273e+007  | 14         |
| 23   | 8,594265e+006  | 5          |
| 24   | 7,474382e+006  | 11         |
| 25   | 6,520255e+006  | 10         |
| 26   | 4,593632e+006  | 9          |
| 27   | 6,336205e+006  | 4          |

D

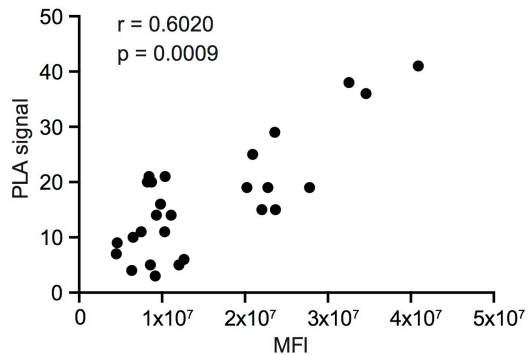

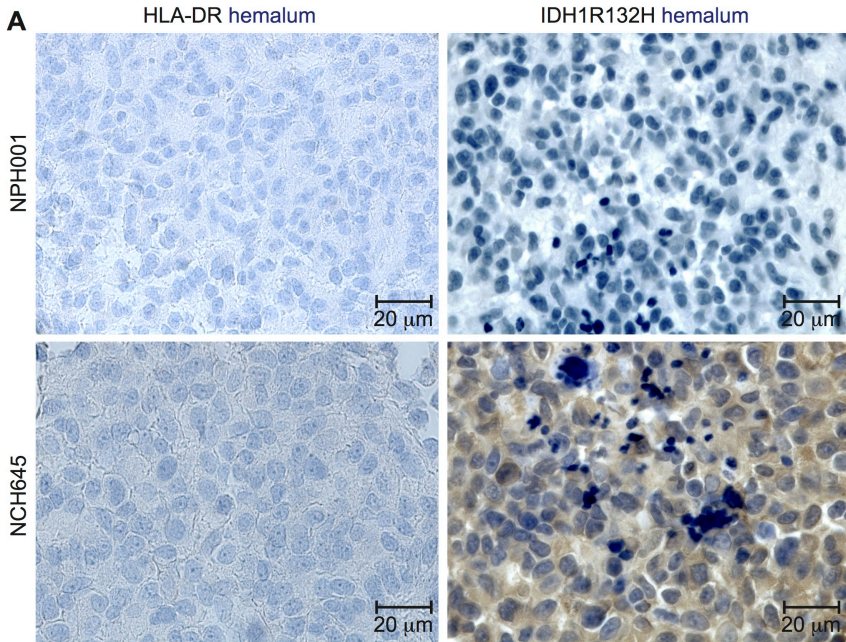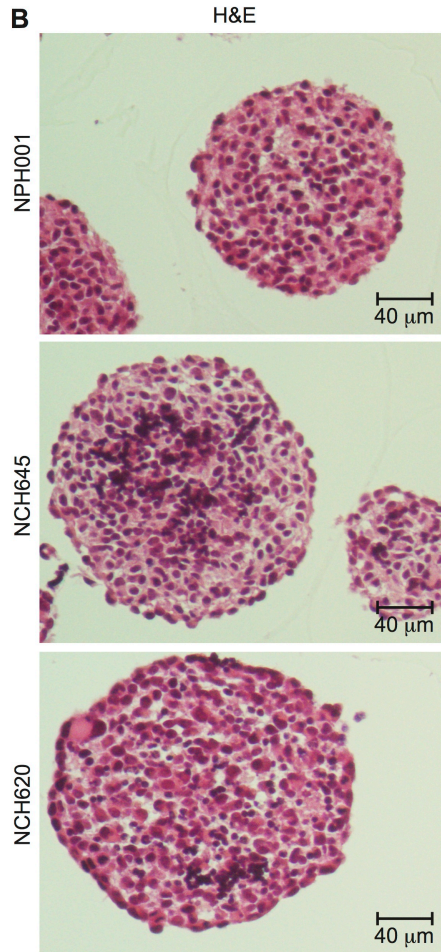

NY-ESO-1

NY-ESO-1 DAPI

LN229 EV

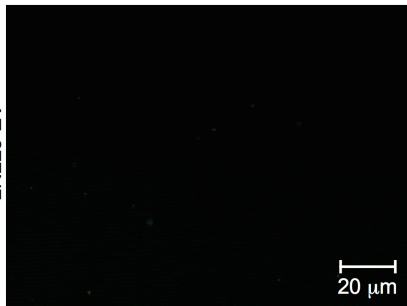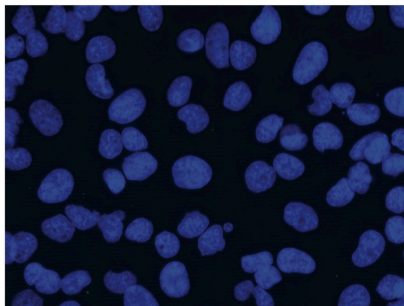

LN229 NY

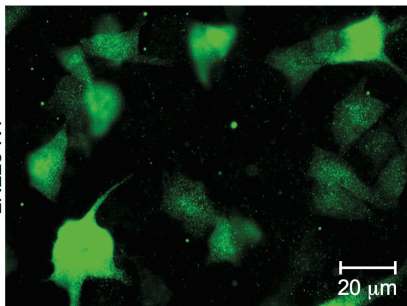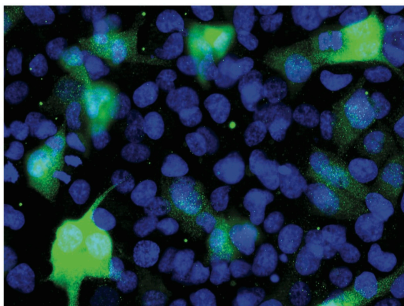



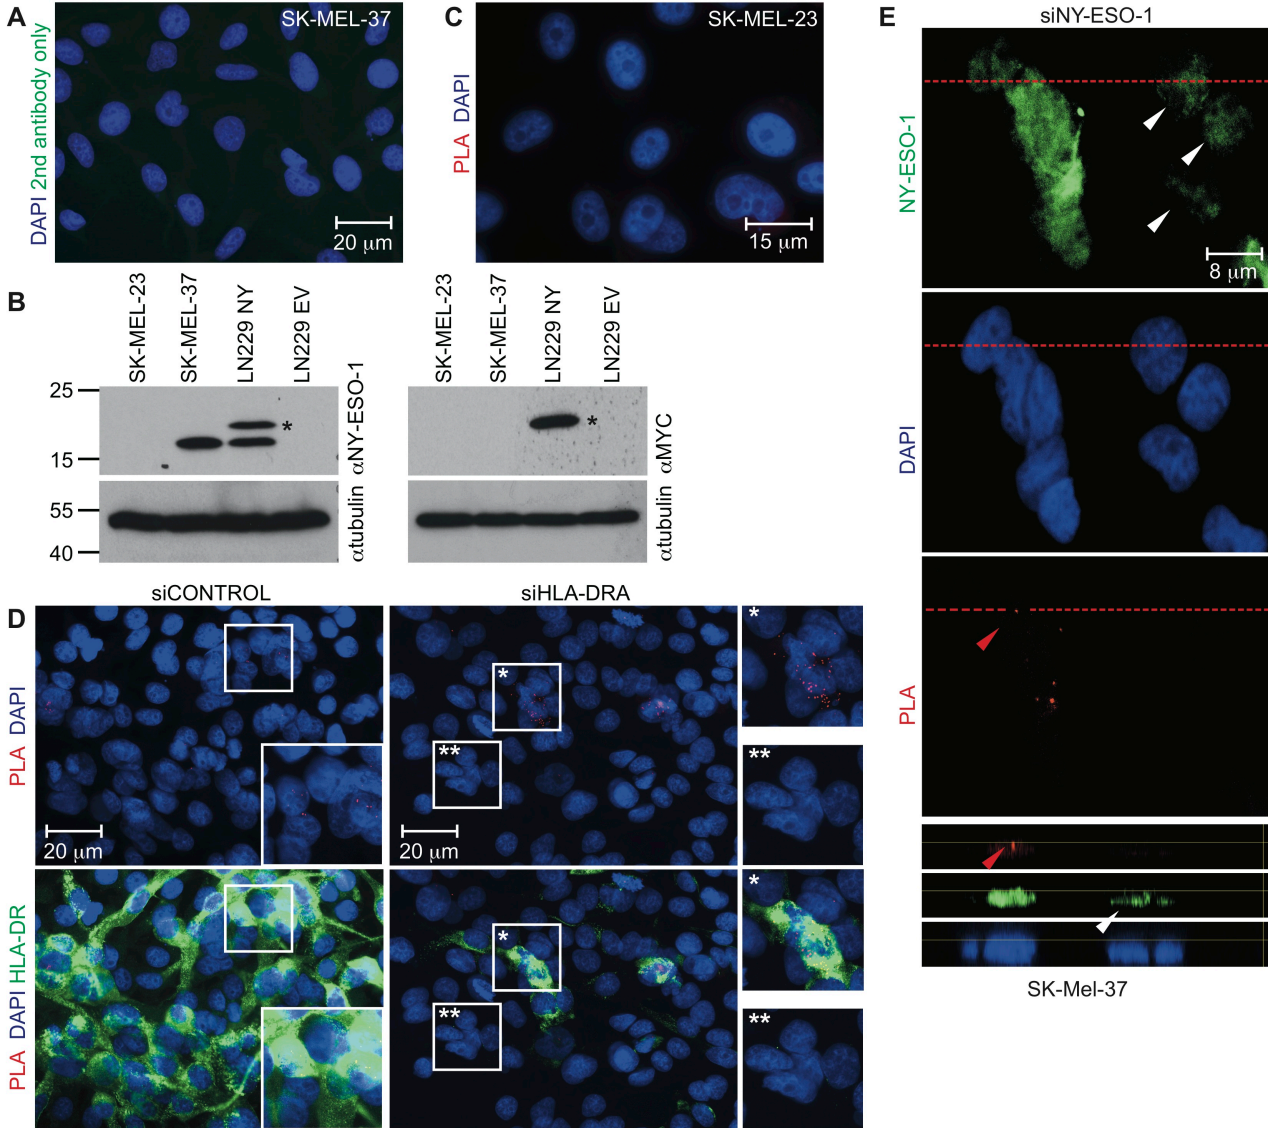

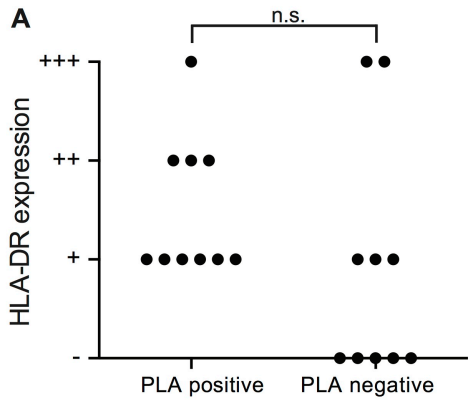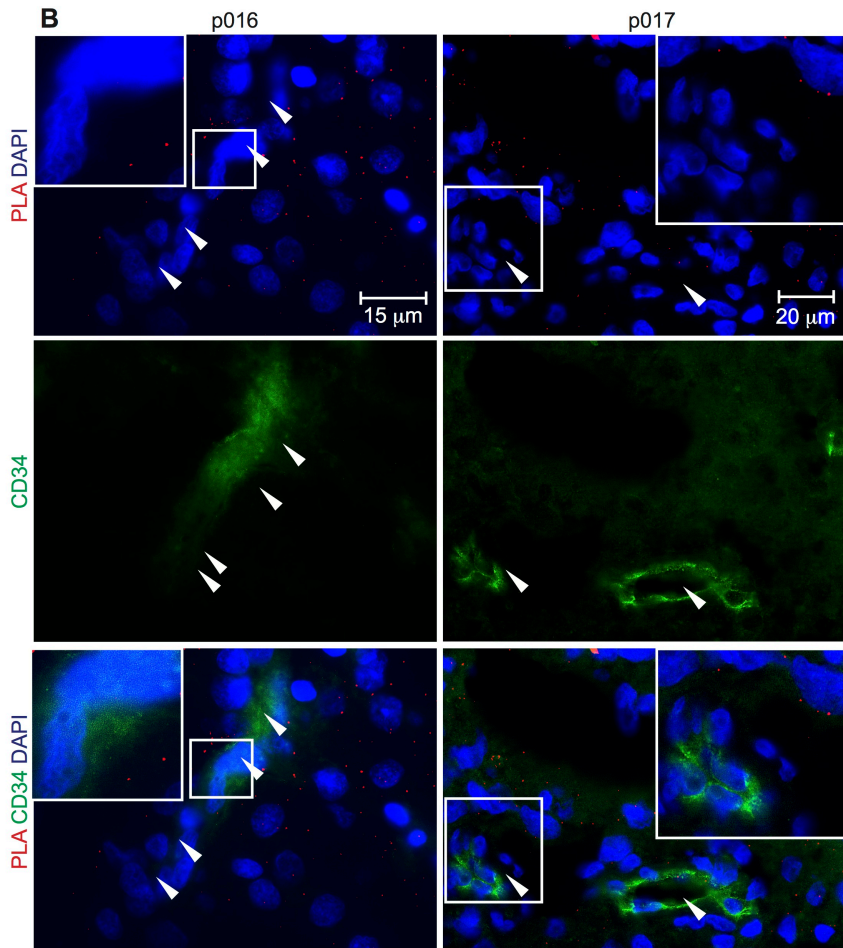

Full unedited gels for Figure 2E

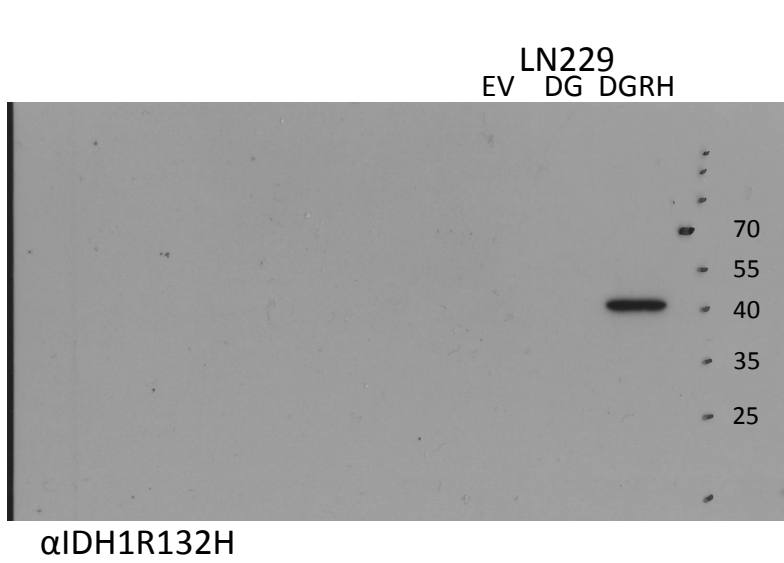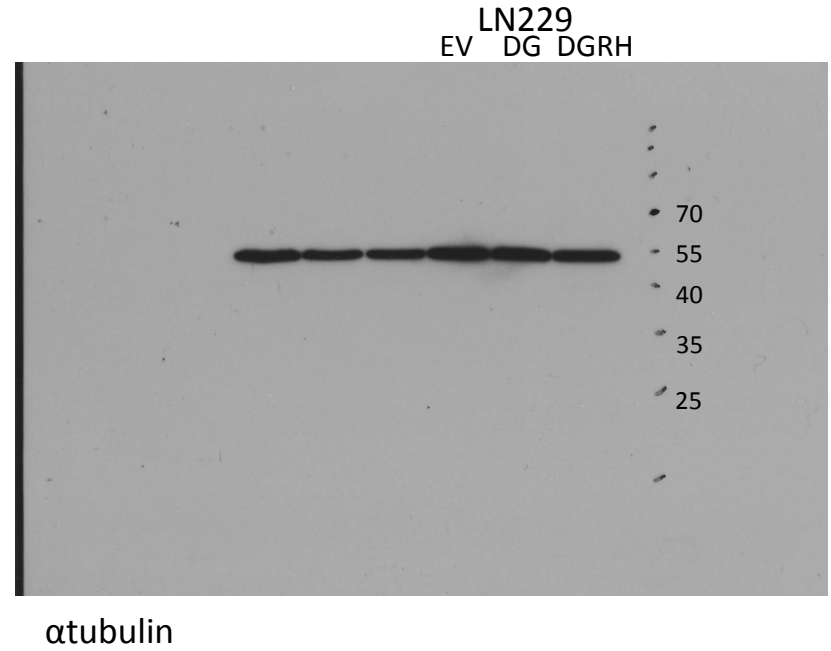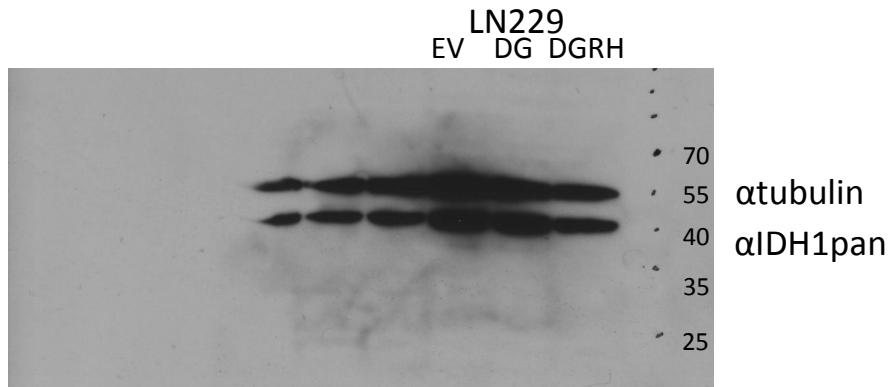

all same membrane

Full unedited gels for Figure 6F

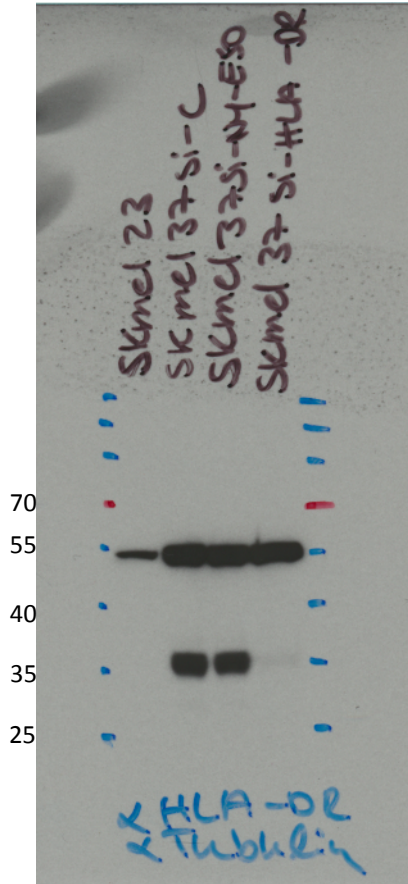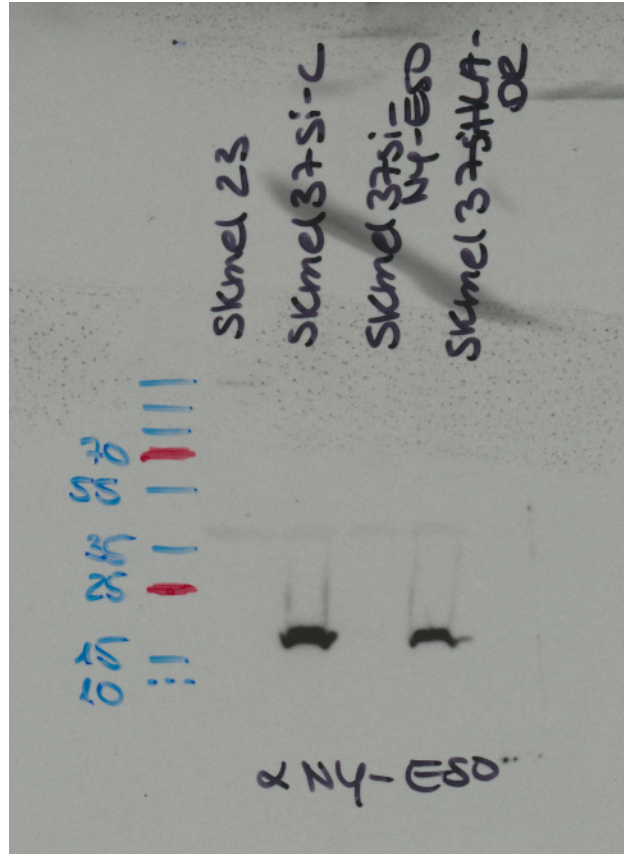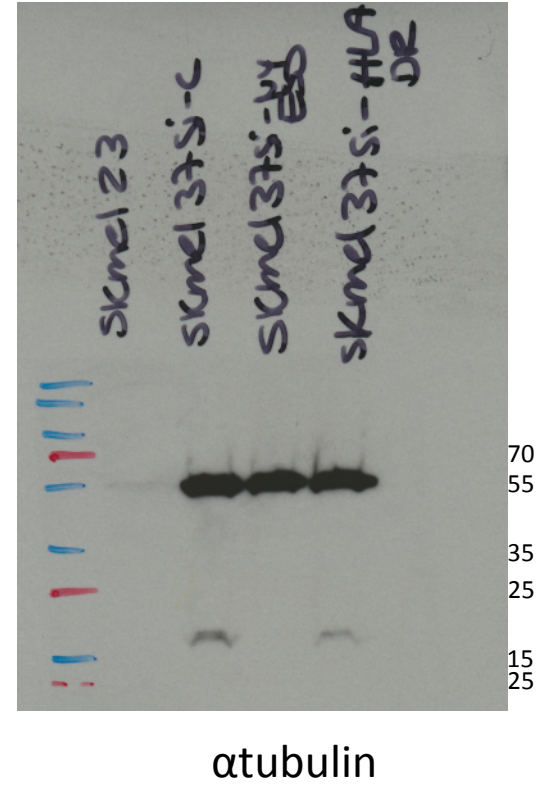

same membrane

# Full unedited gel for Supplementary Figure 6B

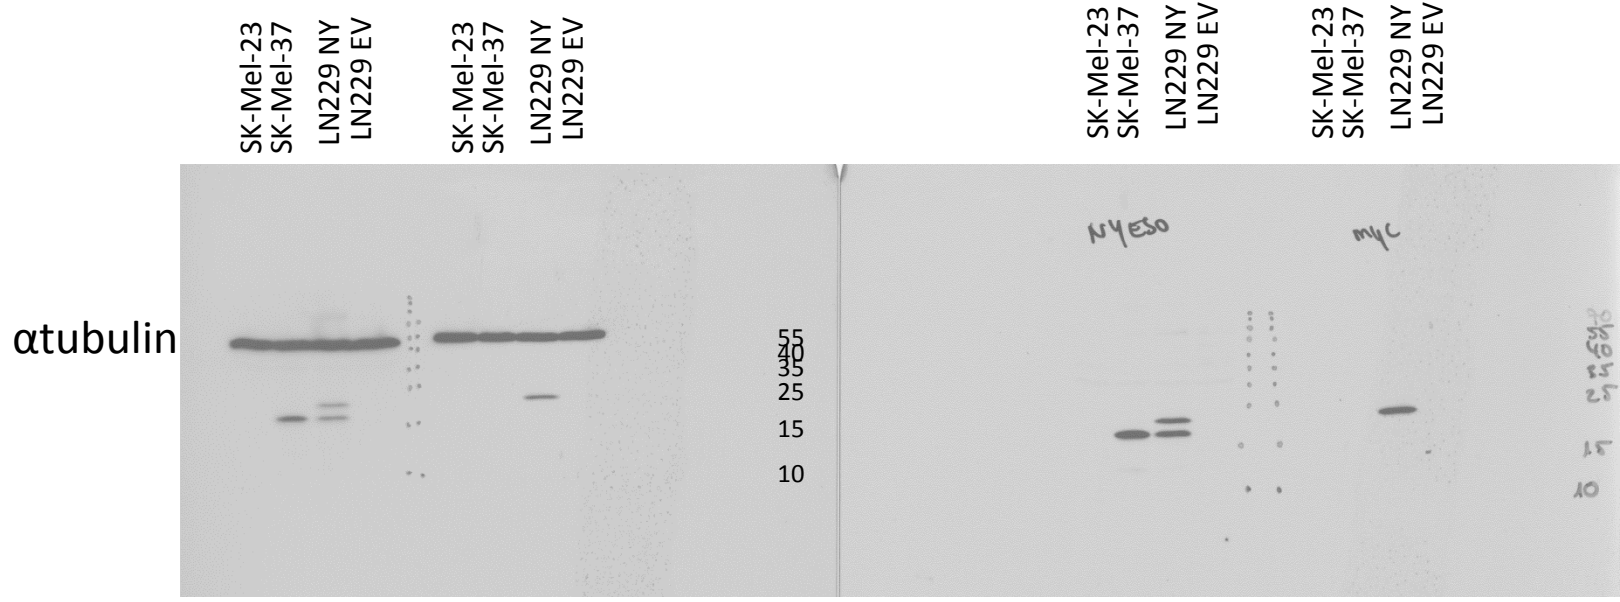

Supplement: sd1 [file 1]
